# Supplementary material for: Characterization of Feruloyl Esterase from Klebsiella oxytoca Z28 and Its Application in the Release of Ferulic Acid from De-Starching Wheat Bran
Source: MDPI journal article supplement (doi:10.3390/microorganisms11040989), 2023-04-10
Supplement: s1 [file s1]

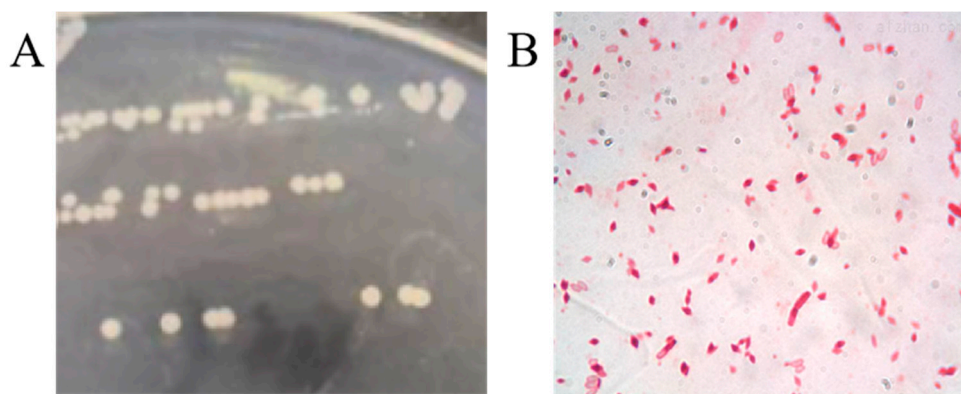

Figure S1. Colony morphology of *Klebsiella oxytoca* Z28 in the medium(A) and Gram staining results of *Klebsiella oxytoca* Z28 under microscope(B).

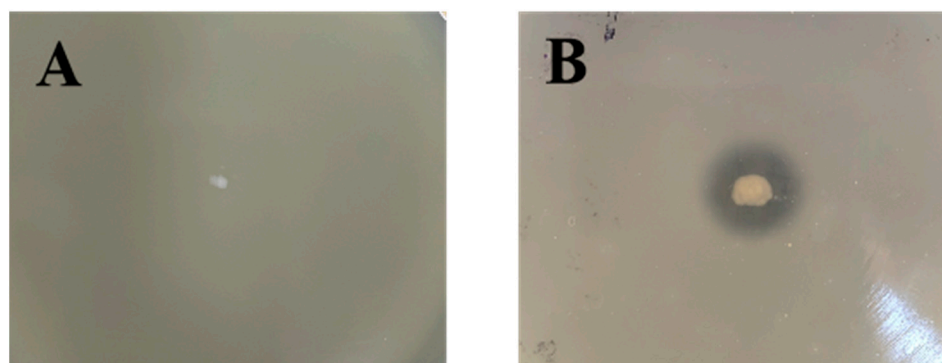

Figure S2. The control group was the degradation of ethyl 4-hydroxy-3-methoxycinnamate in LB medium by *Escherichia coli* BL (DE3) containing pET-28a (A); experimental group: degradation of ethyl 4-hydroxy-3-methoxycinnamate in LB medium by *Escherichia coli* BL (DE3) containing pER-28a-KoFae (B).

The gene sequence of koFAE: ATGAAAAAACTCTCCCTCCTGCTCACCGGCGGCCTGCTGCTTGCCGGCATGGCTTCCTGCGTTAACGCCGGCGAACTTGCTGGCAATACCGAAGGC GCTCAGGTCATTCGCGTGGA AAAAACCCGGGGCCGTATCGATGCGCTCAACGATATCG TTTATAGCCAGGTAAAAAGCACCGTCGCCGTTTCGTCAGCTGCATATGTCTTTACTGGTA CCGCGTAACGGCGATCTGAAACCGGCAATCATCTATTTCCCCGGCGGCGGTTTCACCA GCGCGGCCTGGAATAAGTTTATCGAGATGCGTATGGCGCTGGCGGCGGCGGGATTTCGT CGTCGCGGCGGCGGAATACCGTACGGTTCCCGACACCTTTCCGGCCCCGTTATCGATG GTAAAGCCGCCGTTTCGCTATCTGCGCGAACATGCCGCGGAATACGGTATAGACCCGTCG CGTATTGGCGTGCTGGGGGATTCCGCAGGCGGCTATATGGCGCAGATGCTGGCGCTCAC CAACGGTGACAAAACGTTTCGAGCGTGGCGATAACCTGGCACAATCCTCGGATGTGCAG GCCGCCGCCACGCTGTACGGTATCTCGAACCTGTTGAATATCGGCGAAGGTTTTCCGCA GGCGATTCAAAAAGTGCAACAGTCGCCGGCGGTCACTGAAGCGCTGCTGGTACACGG TAGCGCCTTTTCGCGACTGGCCGGGAGCGACGATTGACAGCGATCCGCAAAAAGCCCT GGCGGCCAGCCCAGTGGGCCATATCAGCGGTAAAAAGCCGCCGTTTTTAATTATGCACG

GCAGCGCCGACACCCTGGTTTCACCGGTACAAAGTCAACAGCTCTATCGCGCGCTGAA  
AAAGGAGGGCAACCCGGCCGATTACGTGTTGCTGGCGGGCGCGGAGCACGGCGATGA  
CAGCTGGTATCAGAAGCCGTTATTGAACGGGTGGTGAAGTGGTTTAAAGCGACCTC  
GGCGCGCCCAAAGCCGCGCGACGGCAGAGAAAGATAAAAACGCCAATCTGTAA

Amino acid sequence of koFAE: MKKLSLLLTGGLLLAGMASCVNAGELAGNTEGAQVIR  
VEKTRGRIDALNDIVYSQVKSTVAVRQLHMSLLVPRNGDLKPaiiYFPGGGFTSAAWNKF  
EMRMALAAAGFVVAAAEYRTVPDTPAPVIDGKAAVRYLREHAAEYIDPSRIGVLGDSA  
GGYMAQMLALTNGDKTFERGDNLAQSSDVQAAATLYGISNLLNIGEGFPQAIQKVHQSPA  
VTEALLVHGSAFRDWPGATIDSDPQKALAASPMGHISGKKPPFLIMHGSADTLVSPVQSQ  
QLYRALKKEGNPADYVLLAGAEHGDDSWYQKPVIERVVNWFKATLGAPKAAATAEKDK  
NANL

Table S1. The original data of ferulic acid yield detected by LC-MS.

| sample name              | Peak area | Ferulic acid yield (ug/g) | average (ug/g) |
|--------------------------|-----------|---------------------------|----------------|
| Standard sample (50ug/L) | 15100000  | -                         | -              |
| Sample 1                 | 32689386  | 237.82                    | 227.15         |
| Sample 2                 | 35910578  | 216.48                    |                |

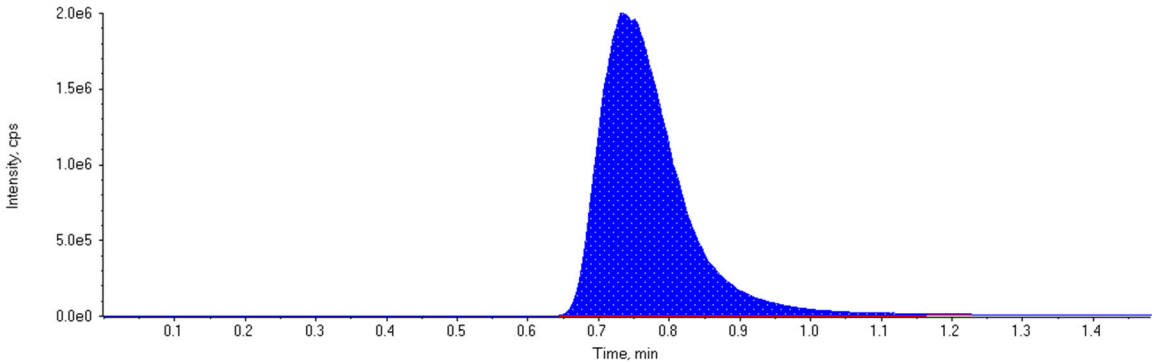

(A)

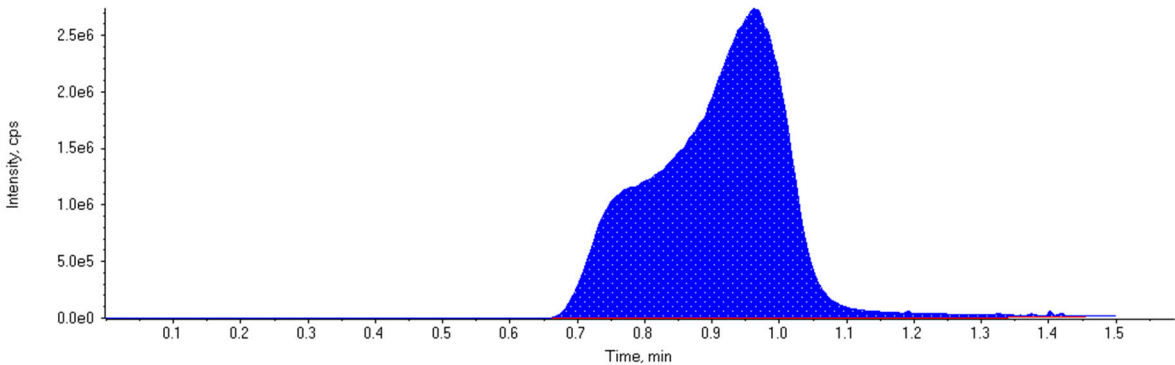

(B)

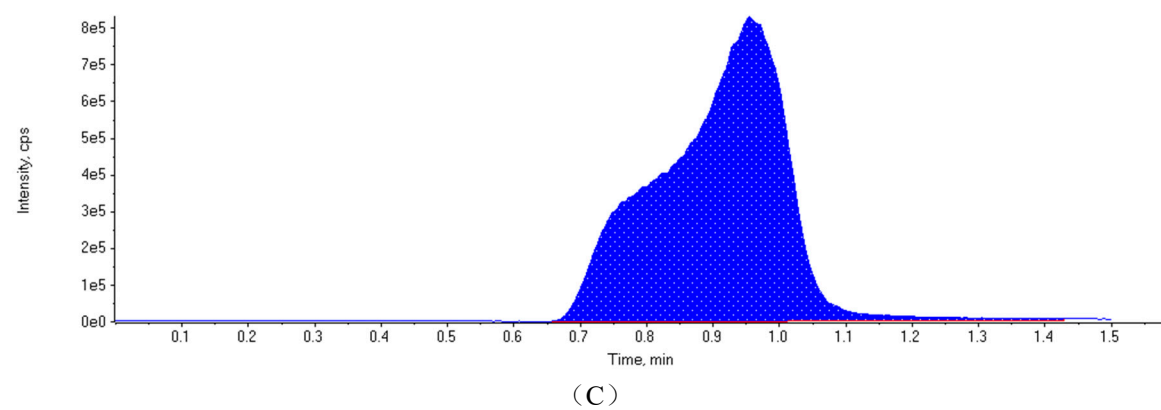

Figure S3. The peak area of ferulic acid was determined by LC-MS; A: Standard sample; B: Sample 1; C: Sample 2.
